# Supplementary material for: Cation complexation with p-tert-butylcalix[5]arene pentacarboxylic acid derivative: An allosteric regulation of the first metal ion for stepwise extraction of the second ion
Source: Royal Society of Chemistry journal article supplement (doi:10.1039/c1an15199a), 2011-01-01

## Supplementary Data

### **Cation Complexation with *p*-*tert*-butylcalix[5]arene Pentacarboxylic Acid Derivative: An Allosteric Regulation of The First Metal Ion For Stepwise Extraction of The Second Ion**

Birendra Babu Adhikari<sup>a</sup>, Manju Gurung<sup>a</sup>, Hidetaka Kawakita<sup>a</sup> and Keisuke Ohto<sup>a</sup>

<sup>a</sup>Department of Chemistry and Applied Chemistry, Faculty of Science and Engineering, Saga University, 1-Honjo, 840-8502, Saga, Japan

**Fig SF1** <sup>1</sup>H NMR spectrum of Na complexed **2** in CDCl<sub>3</sub> (solvent peak at 7.26 ppm)

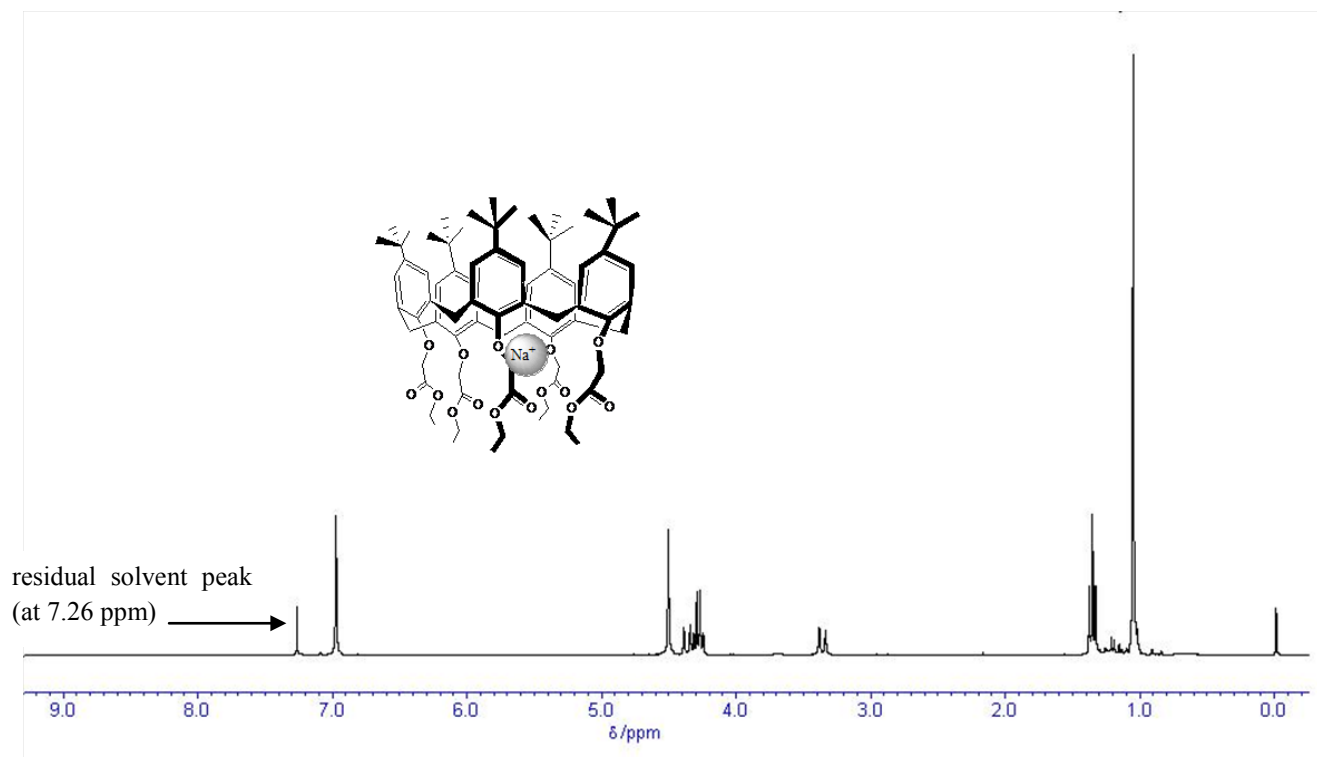

**Fig SF2**  $^1\text{H-NMR}$  spectrum of Na free **2** in  $\text{CDCl}_3$

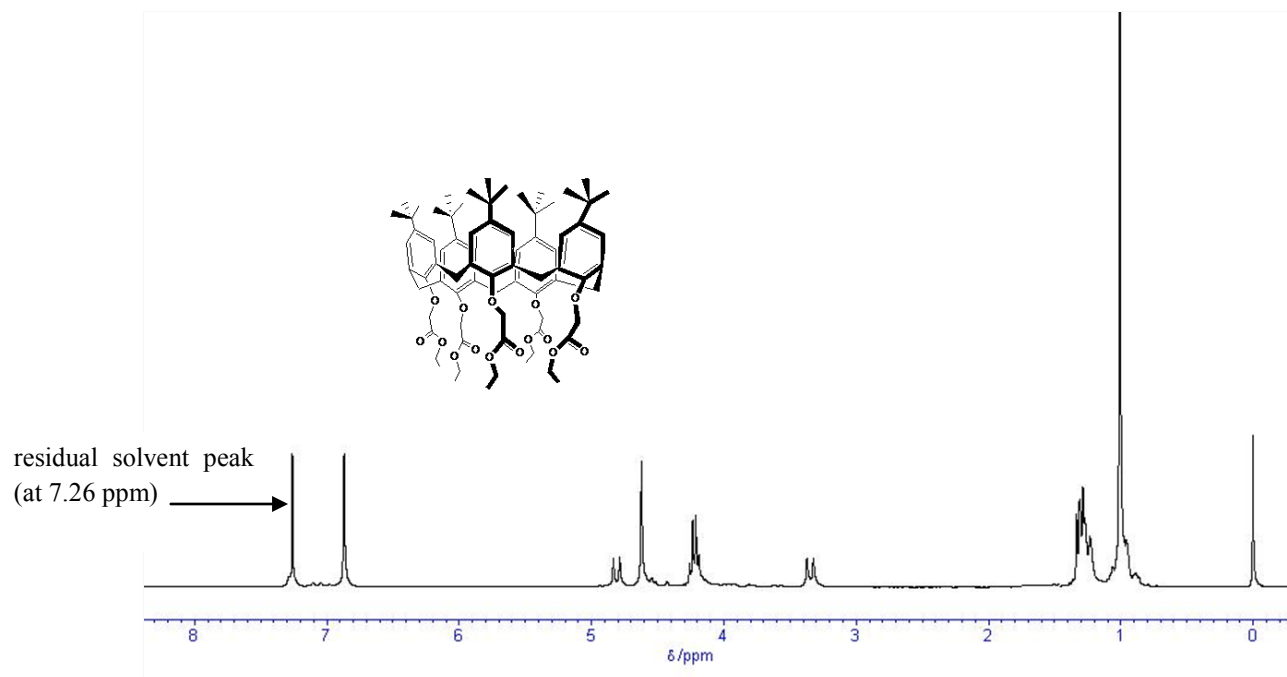

**Fig SF3**  $^1\text{H}$ -NMR spectrum of **3** in  $\text{CDCl}_3$

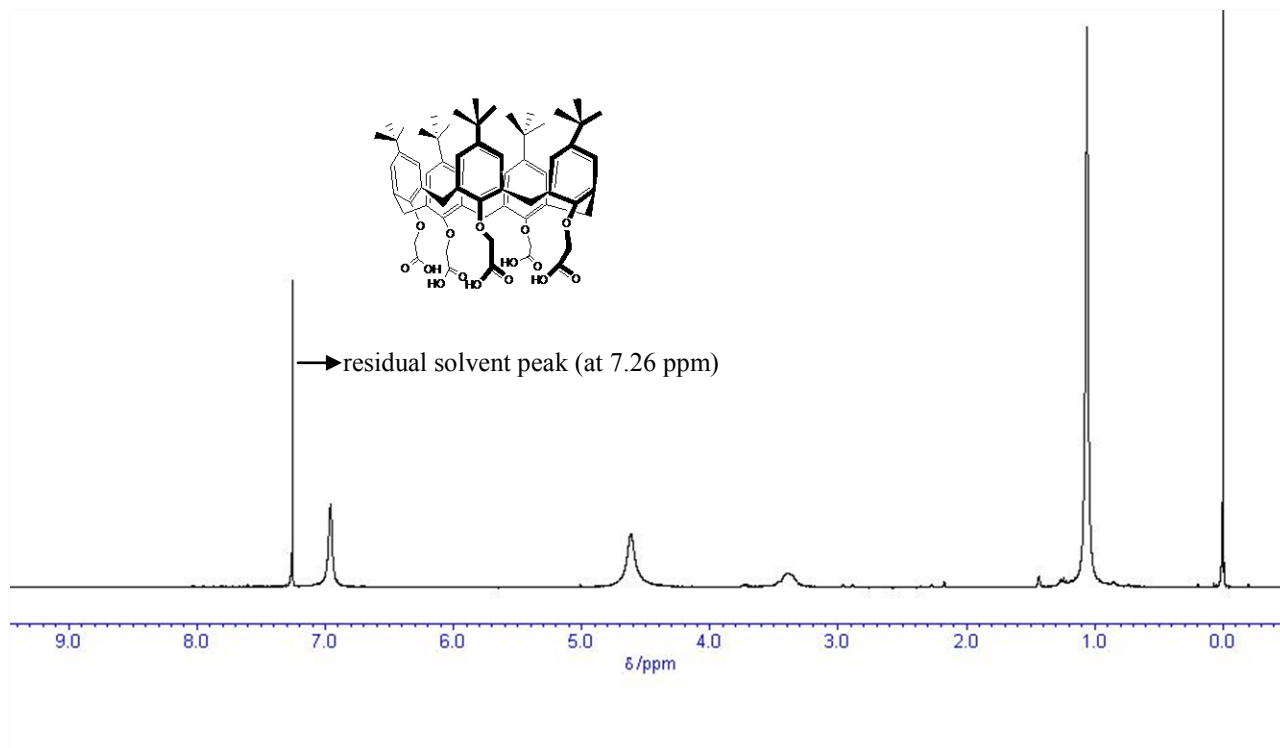

**Fig. SF4** Typical Job's plot for extraction of (a) Zn(II), (b) Co(II) and (c) Ni(II) with **3**.

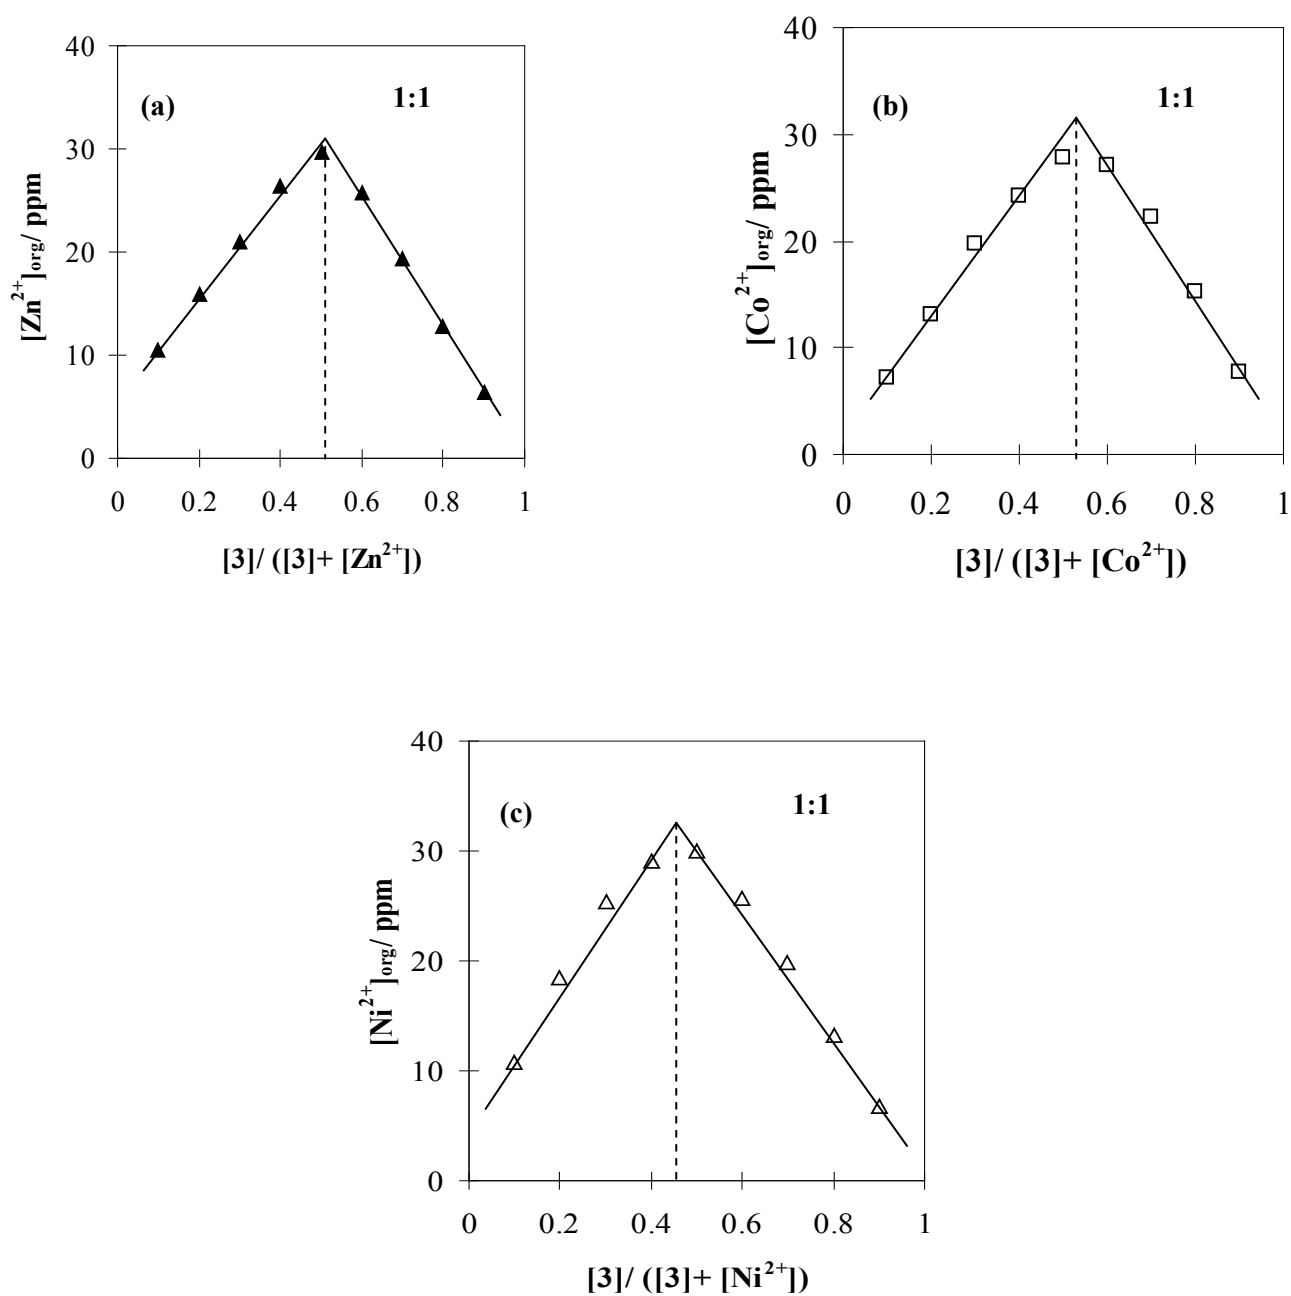

**Fig. SF5** Nitrate dependency test for the extraction of lead ion with **3**.  $[3] = 2.0 \text{ mM}$ ,  $[\text{Pb}^{2+}] = 0.1 \text{ mM}$ , adjustment of  $[\text{NO}_3^-] = 1.0 \text{ M LiNO}_3$  in  $0.05 \text{ M HNO}_3$ , phase ratio = 1, shaking time = 8.0 h at 303 K.

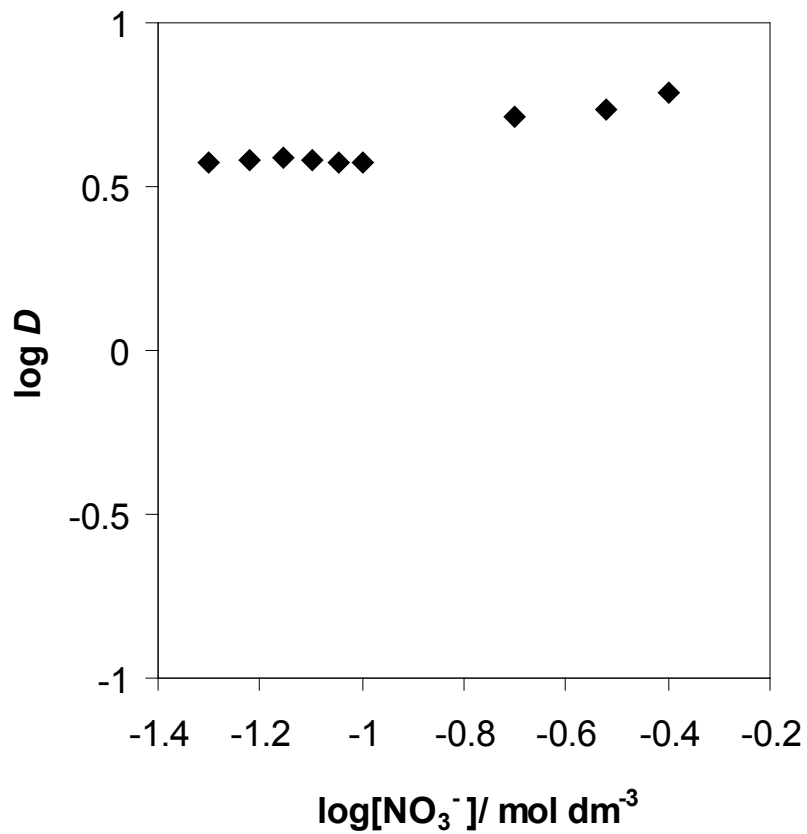

**Fig. SF6** Effect of added lead on percentage shift ( $\Delta$ ) of aryl peak with corresponding percentage loading ( $\blacklozenge$ ) of metal ion on **3**.

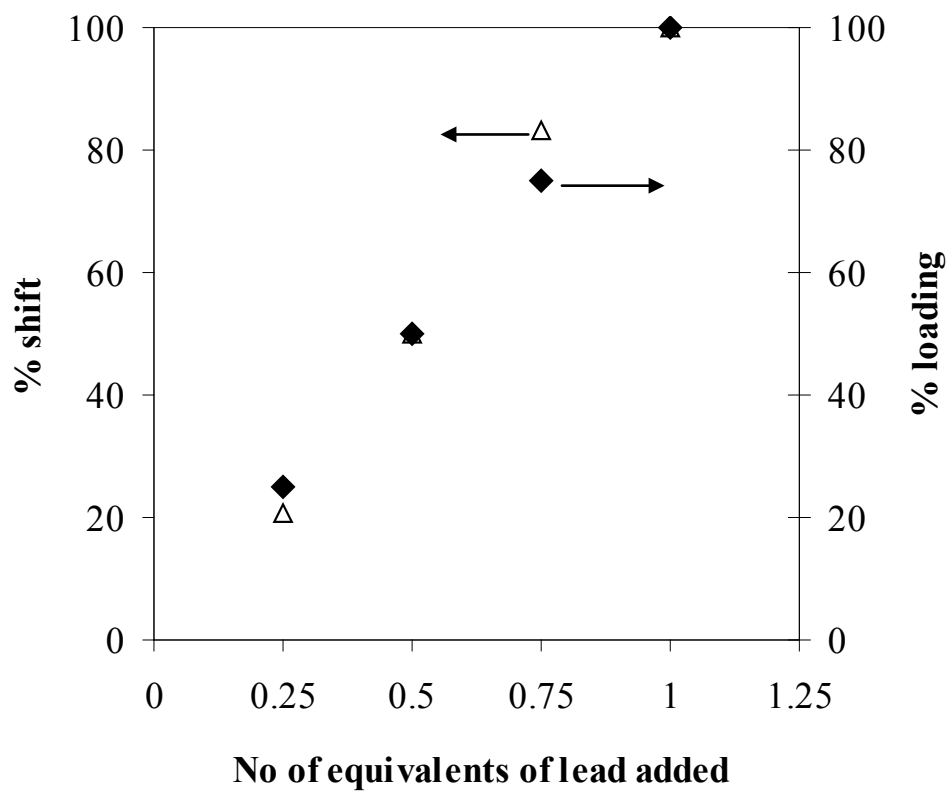

Fig SF7 IR spectra (KBr) of **3**, **3**•Cu<sup>2+</sup> and **3**•(Pb<sup>2+</sup>)<sub>2</sub> complexes

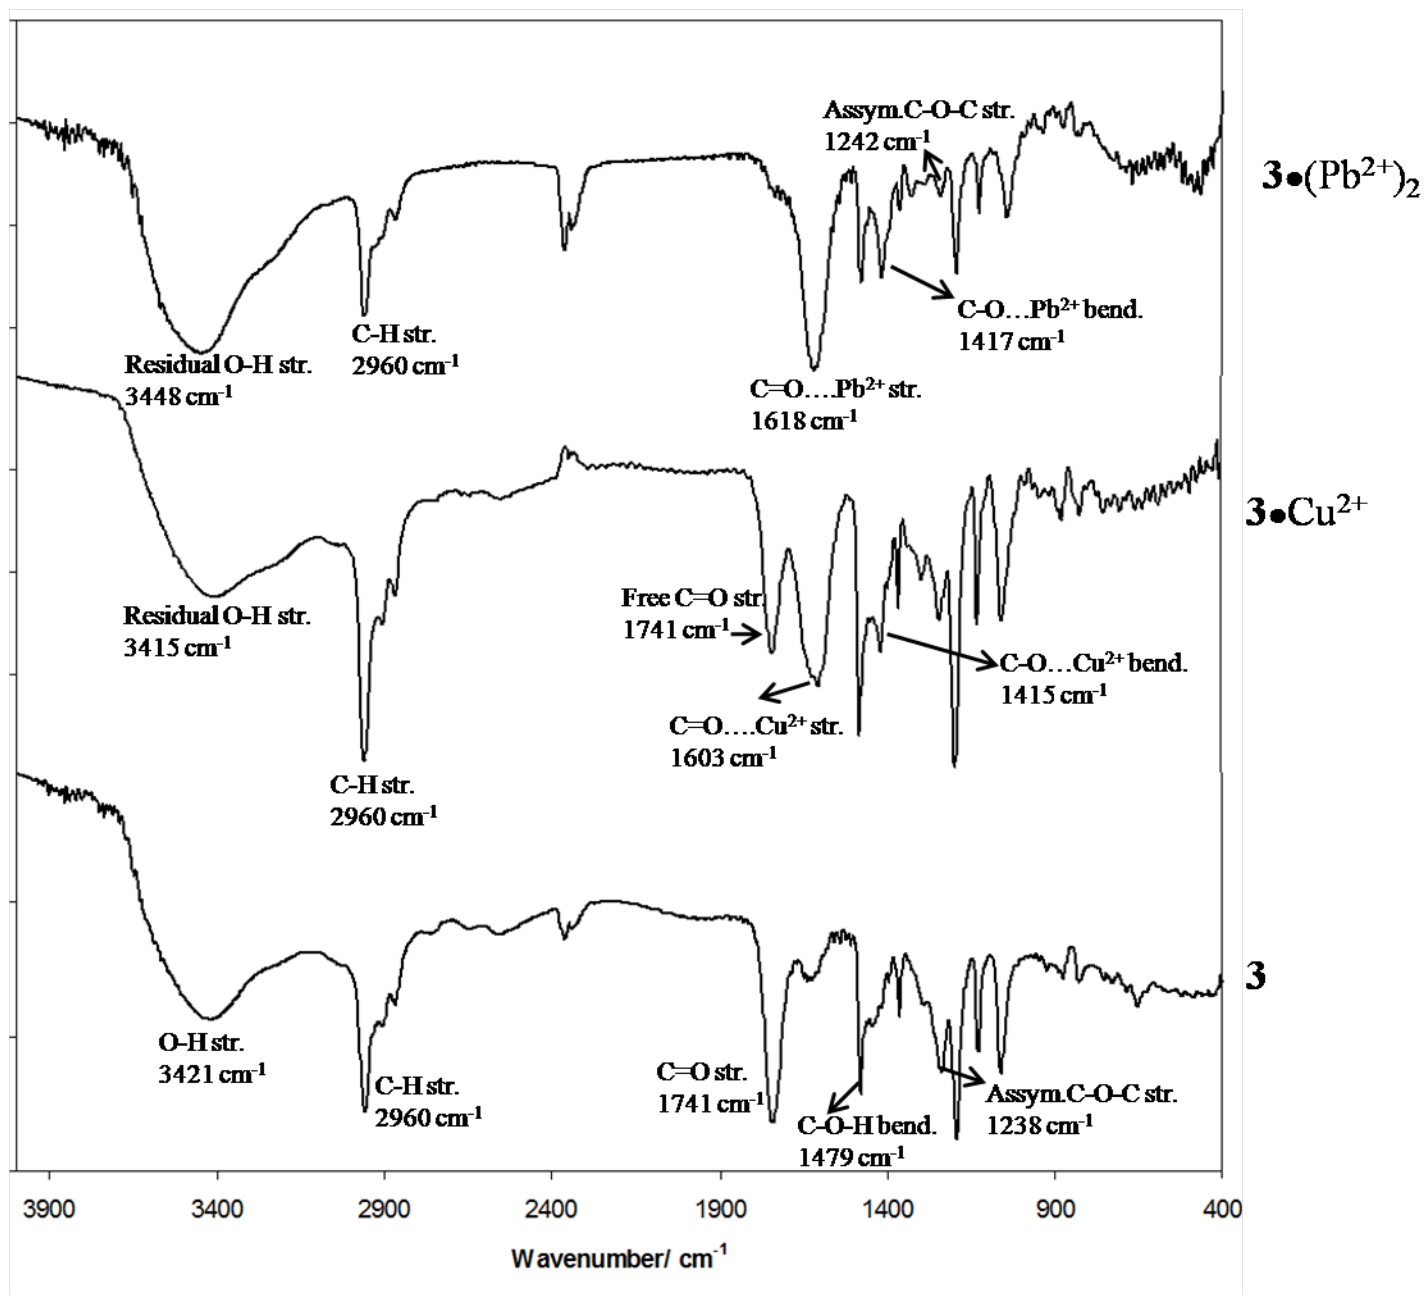

**Fig SF8** FT-IR spectrum (KBr) of  $3 \cdot \text{Pb}^{2+}$  complex

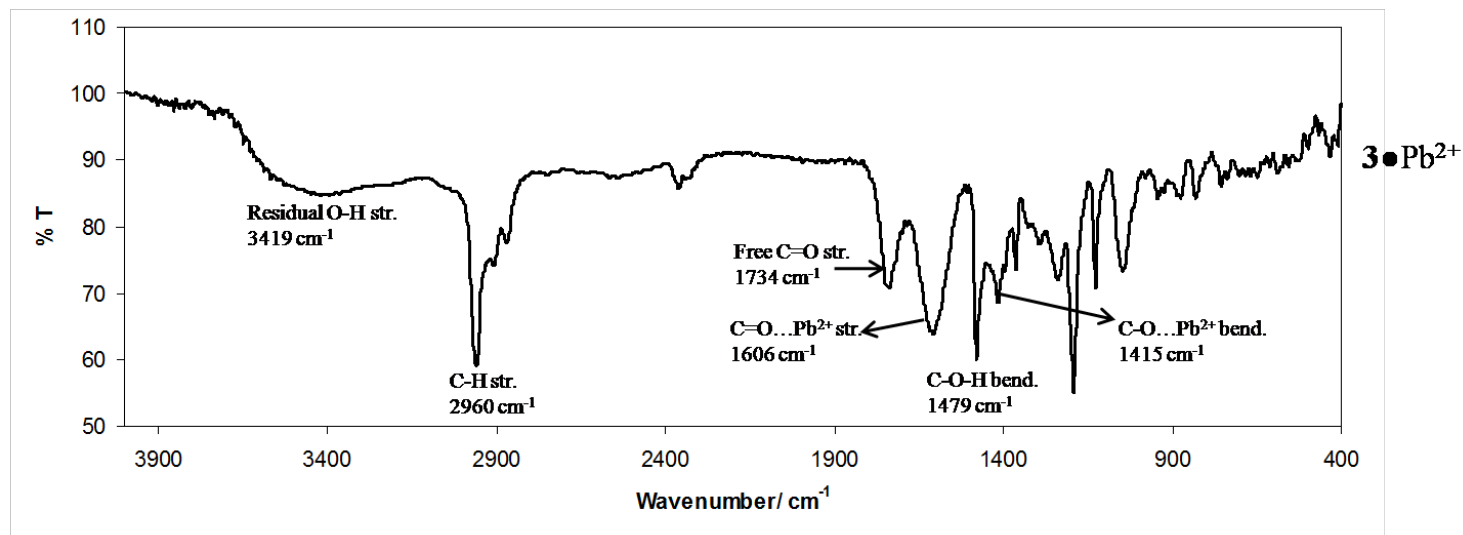



**Fig. SF9** Effect of acid concentration on percentage stripping of loaded Pb(II).  
[Pb(II)]<sub>loaded</sub> = 0.1 mM, [3] = 2.0 mM, phase ratio = 1, shaking time = 8 h at 303 K,  
[Pb]<sub>loaded</sub> = 0.1 mM.

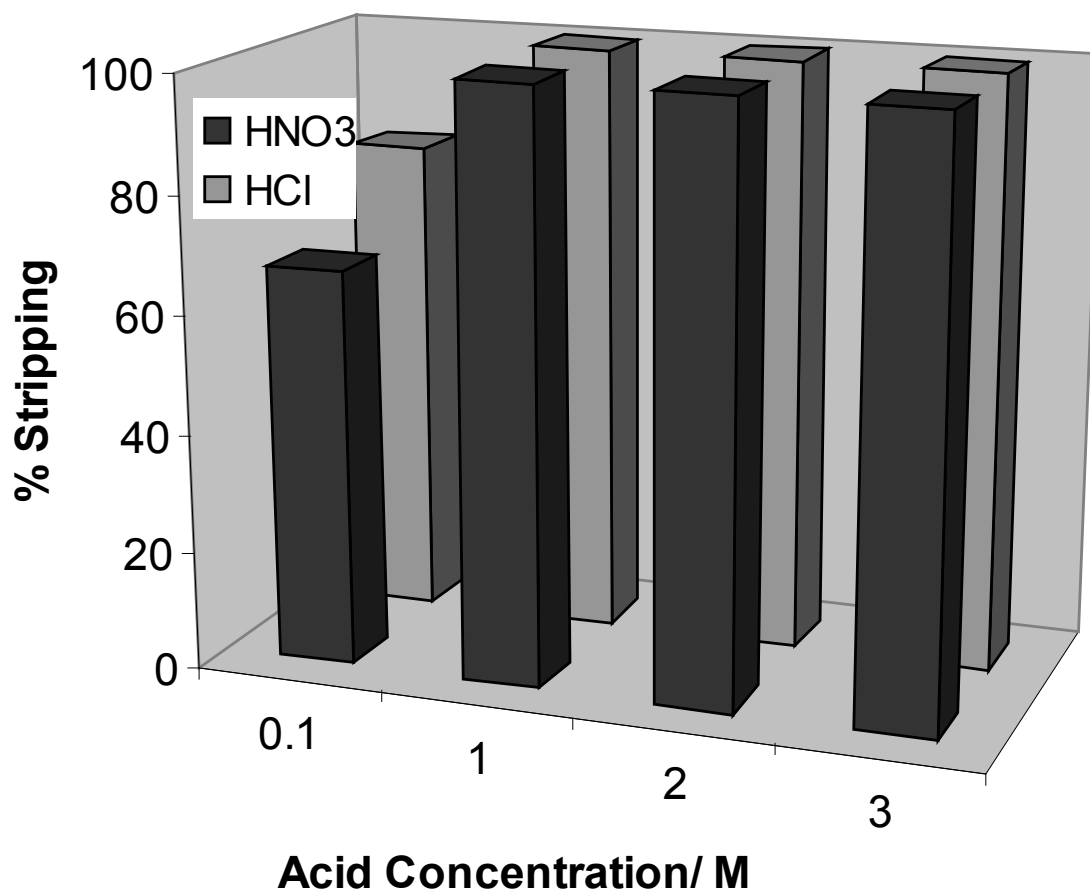

Supplement: c1an15199a.pdf [file c1an15199a.pdf]
